# Supplementary material
Source: PubMed Central journal article supplement (PMC4186960)
Supplement: NIHMS622714-supplement-ESI.pdf [file NIHMS622714-supplement-ESI.pdf]

## Microheterogeneity metrics for diffusion in soft matter: Supplemental Material

### Fractional Brownian motion model of HA

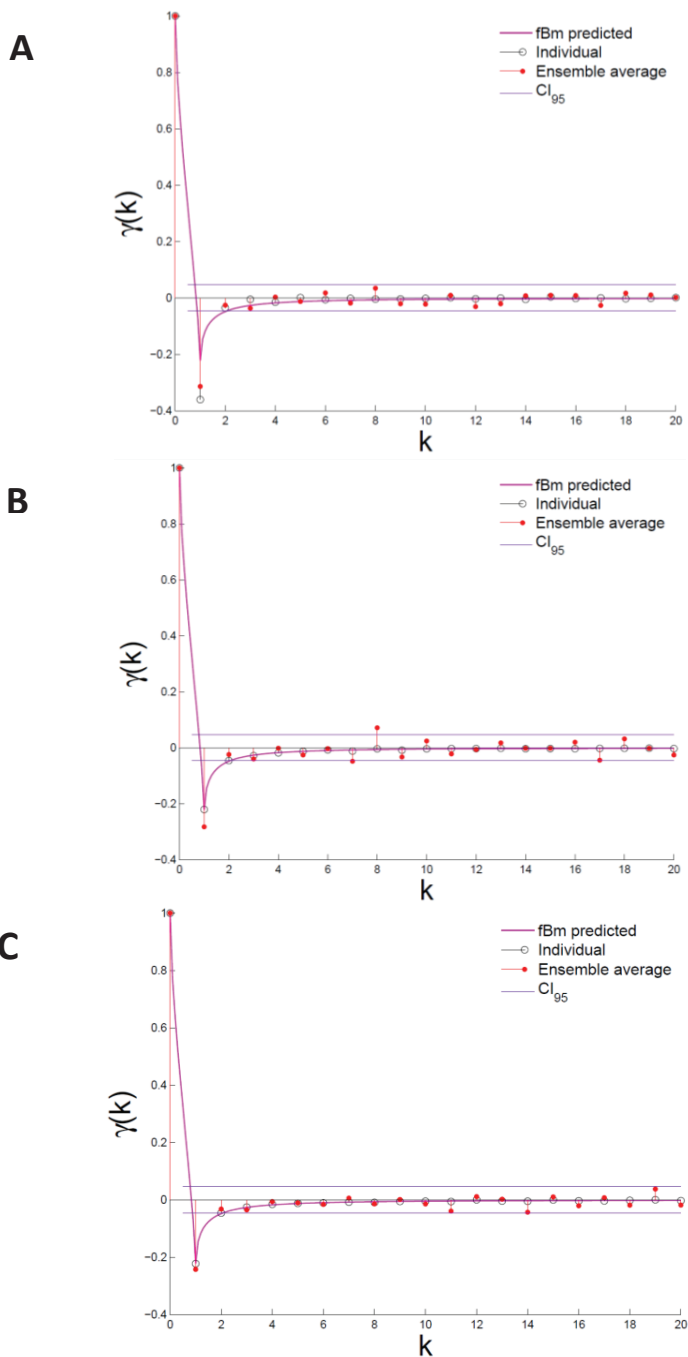

Figure S1: Autocovariance of 10mg/ml HA experimental data (S1A) and two simulated data sets (S1B,S1C). In B, the data were generated using  $\alpha = 0.638$  and  $D_{fBm} = 9.58E^{-5} \mu m^2 / s^\alpha$ . These are the best-fit fractional Brownian parameters from the data in A. In C, the data were generated using  $\alpha = 0.638$  and  $D_{fBm} = 1E^{-5} \mu m^2 / s^\alpha$ . Each data set contains 175 particle paths.

### Metric Comparison on two-cluster data sets

**Table S1: Metric comparison on 2-cluster data sets described in Sec. 4.2.2. The second through fourth column show the values of the non-Gaussian parameter, excess kurtosis and heterogeneity ratio, respectively, for each of the four 2-cluster data sets. The fifth through seventh columns show the relative contributions of the 10%, 25% and 50% highest values of the individual compliance to the ensemble mean, respectively. The final column shows the results of the Stage 2 metric of Valentine *et al.*<sup>1</sup> described in Section 2.2.**

|                | NG<br>(Eqn. 2) <sup>2</sup> | Ku<br>(Eqn. 3) <sup>3</sup> | HR<br>(Eqn. 4) <sup>4</sup> | Tseng<br>10% <sup>5</sup> | Tseng<br>25% | Tseng<br>50% | F-test <sup>1</sup> |
|----------------|-----------------------------|-----------------------------|-----------------------------|---------------------------|--------------|--------------|---------------------|
| $\Delta=0.050$ | $9.11E^{-2}$                | $2.73E^{-1}$                | $8.44E^1$                   | $1.12E^1$                 | $2.72E^1$    | $5.28E^1$    | 2-3                 |
| $\Delta=0.075$ | $3.25E^{-1}$                | $1.08E^{-1}$                | $9.88E^1$                   | $1.13E^1$                 | $2.74E^1$    | $5.29E^1$    | 2-3                 |
| $\Delta=0.10$  | $3.57E^{-1}$                | $1.19E^{-1}$                | $1.14E^2$                   | $1.15E^1$                 | $2.77E^1$    | $5.34E^1$    | 2-3                 |

## Homogeneous Data: Simulated and Experimental

### Simulated Newtonian

Table S2: Results for simulated homogeneous Newtonian data. Superscript  $s$  identifies the values used to generate the data and superscript  $p$  the values predicted by the clustering algorithm.

|                         | Power law exponent |              |                            | Fractional Diffusion Coefficient ( $\mu\text{m}^2/s^\alpha$ ) |              |                            |
|-------------------------|--------------------|--------------|----------------------------|---------------------------------------------------------------|--------------|----------------------------|
|                         | $\alpha^s$         | $\alpha^p$   | $CI_{95}$                  | $D_{fBm}^s$                                                   | $D_{fBm}^p$  | $CI_{95}$                  |
| $\sigma_x$<br>Cluster 1 | $1.00E^0$          | $9.66E^{-1}$ | $(9.33E^{-1}, 9.98E^{-1})$ | $1.61E^{-2}$                                                  | $1.60E^{-2}$ | $(1.59E^{-2}, 1.62E^{-2})$ |
| $\sigma_y$<br>Cluster 1 | $1.00E^0$          | $1.02E^0$    | $(9.91E^{-1}, 1.06E^0)$    | $1.61E^{-2}$                                                  | $1.58E^{-2}$ | $(1.56E^{-2}, 1.60E^{-2})$ |

### Experimental Newtonian

Table S3: Results for experimental homogeneous Newtonian data. Superscript  $e$  identifies the expected values and superscript  $p$  the values predicted by the clustering algorithm.

|                         | Power law exponent |              |                            | Fractional Diffusion Coefficient ( $\mu\text{m}^2/s^\alpha$ ) |              |                            |
|-------------------------|--------------------|--------------|----------------------------|---------------------------------------------------------------|--------------|----------------------------|
|                         | $\alpha^e$         | $\alpha^p$   | $CI_{95}$                  | $D_{fBm}^e$                                                   | $D_{fBm}^p$  | $CI_{95}$                  |
| $\sigma_x$<br>Cluster 1 | $1.00E^0$          | $9.81E^{-1}$ | $(9.62E^{-1}, 1.00E^{-1})$ | $1.61E^{-2}$                                                  | $1.37E^{-2}$ | $(1.36E^{-2}, 1.38E^{-2})$ |
| $\sigma_y$<br>Cluster 1 | $1.00E^0$          | $9.56E^{-1}$ | $(9.20E^{-1}, 9.92E^{-1})$ | $1.61E^{-2}$                                                  | $1.44E^{-2}$ | $(1.42E^{-2}, 1.45E^{-2})$ |

### Experimental Newtonian ( $\alpha$ fixed)

Table S4: Results for experimental homogeneous Newtonian data when fBm exponent is fixed at  $\alpha = 1$ . Superscripts same as Table S2.

|                         | Diffusion Coefficient ( $\mu\text{m}^2/s$ ) |              |                            |
|-------------------------|---------------------------------------------|--------------|----------------------------|
|                         | $D_{fBm}^e$                                 | $D_{fBm}^p$  | $CI_{95}$                  |
| $\sigma_x$<br>Cluster 1 | $1.61E^{-2}$                                | $1.36E^{-2}$ | $(1.35E^{-2}, 1.37E^{-2})$ |
| $\sigma_y$<br>Cluster 1 | $1.61E^{-2}$                                | $1.43E^{-2}$ | $(1.40E^{-2}, 1.45E^{-2})$ |

### Simulated Non-Newtonian

Table S5: Results for simulated homogeneous non-Newtonian data. Superscripts same as Table S1.

|                         | Power law exponent |              |                            | Fractional Diffusion Coefficient ( $\mu m^2 / s^\alpha$ ) |              |                            |
|-------------------------|--------------------|--------------|----------------------------|-----------------------------------------------------------|--------------|----------------------------|
|                         | $\alpha^s$         | $\alpha^p$   | $CI_{95}$                  | $D_{fBm}^s$                                               | $D_{fBm}^p$  | $CI_{95}$                  |
| $\sigma_x$<br>Cluster 1 | $5.76E^{-1}$       | $5.16E^{-1}$ | $(4.45E^{-1}, 5.88E^{-1})$ | $9.30E^{-5}$                                              | $9.69E^{-5}$ | $(9.35E^{-5}, 1.00E^{-4})$ |
| $\sigma_y$<br>Cluster 1 | $5.76E^{-1}$       | $5.92E^{-1}$ | $(5.68E^{-1}, 6.16E^{-1})$ | $9.30E^{-5}$                                              | $9.51E^{-5}$ | $(9.40E^{-5}, 9.61E^{-5})$ |

### Experimental Non-Newtonian

Table S6: Results for experimental homogeneous non-Newtonian data. Superscripts same as Table S2.

|                         | Power law exponent |              |                            | Fractional Diffusion Coefficient ( $\mu m^2 / s^\alpha$ ) |              |                            |
|-------------------------|--------------------|--------------|----------------------------|-----------------------------------------------------------|--------------|----------------------------|
|                         | $\alpha^e$         | $\alpha^p$   | $CI_{95}$                  | $D_{fBm}^e$                                               | $D_{fBm}^p$  | $CI_{95}$                  |
| $\sigma_x$<br>Cluster 1 | N/A                | $5.76E^{-1}$ | $(5.08E^{-1}, 6.45E^{-1})$ | N/A                                                       | $9.63E^{-5}$ | $(9.32E^{-5}, 9.94E^{-5})$ |
| Cluster 2               | N/A                | $4.41E^{-1}$ | $(3.71E^{-1}, 5.11E^{-1})$ | N/A                                                       | $1.52E^{-4}$ | $(1.46E^{-4}, 1.58E^{-4})$ |
| $\sigma_y$<br>Cluster 1 | N/A                | $5.73E^{-1}$ | $(4.91E^{-1}, 6.55E^{-1})$ | N/A                                                       | $9.09E^{-5}$ | $(8.74E^{-5}, 9.44E^{-5})$ |
| Cluster 2               | N/A                | $4.37E^{-1}$ | $(3.15E^{-1}, 5.59E^{-1})$ | N/A                                                       | $1.21E^{-4}$ | $(1.13E^{-4}, 1.29E^{-4})$ |

## Heterogeneous Data: Simulated and Experimental

### Simulated Newtonian

Table S7: Results for simulated heterogeneous Newtonian data. Superscripts same as Table S1.

|            | Power law exponent |              |                            | Fractional Diffusion Coefficient ( $\mu\text{m}^2/s\alpha$ ) |              |                            |
|------------|--------------------|--------------|----------------------------|--------------------------------------------------------------|--------------|----------------------------|
|            | $\alpha^s$         | $\alpha^p$   | $CI_{95}$                  | $D_{fBm}^s$                                                  | $D_{fBm}^p$  | $CI_{95}$                  |
| $\sigma_x$ |                    |              |                            |                                                              |              |                            |
| Cluster 1  | $1.00E^0$          | $9.72E^{-1}$ | $(9.41E^{-1}, 1.00E^0)$    | $8.05E^{-3}$                                                 | $7.81E^{-3}$ | $(7.73E^{-3}, 7.90E^{-3})$ |
| Cluster 2  | $1.00E^0$          | $1.02E^0$    | $(9.97E^{-1}, 1.03E^0)$    | $1.61E^{-2}$                                                 | $1.60E^{-2}$ | $(1.59E^{-2}, 1.61E^{-2})$ |
| $\sigma_y$ |                    |              |                            |                                                              |              |                            |
| Cluster 1  | $1.00E^0$          | $9.51E^{-1}$ | $(9.24E^{-1}, 9.79E^{-1})$ | $8.05E^{-3}$                                                 | $7.46E^{-3}$ | $(7.39E^{-3}, 7.54E^{-3})$ |
| Cluster 2  | $1.00E^0$          | $9.98E^{-1}$ | $(9.59E^{-1}, 1.04E^0)$    | $1.61E^{-2}$                                                 | $1.56E^{-2}$ | $(1.54E^{-2}, 1.59E^{-2})$ |

### Experimental Newtonian

Table S8: Results for experimental heterogeneous Newtonian data. Superscripts same as Table S2.

|            | Power law exponent |              |                            | Fractional Diffusion Coefficient ( $\mu\text{m}^2/s\alpha$ ) |              |                            |
|------------|--------------------|--------------|----------------------------|--------------------------------------------------------------|--------------|----------------------------|
|            | $\alpha^e$         | $\alpha^p$   | $CI_{95}$                  | $D_{fBm}^e$                                                  | $D_{fBm}^p$  | $CI_{95}$                  |
| $\sigma_x$ |                    |              |                            |                                                              |              |                            |
| Cluster 1  | $1.00E^0$          | $9.84E^{-1}$ | $(9.60E^{-1}, 1.01E^{-1})$ | $1.61E^{-2}$                                                 | $1.28E^{-2}$ | $(1.27E^{-2}, 1.29E^{-2})$ |
| Cluster 2  | $1.00E^0$          | $9.52E^{-1}$ | $(9.08E^{-1}, 9.97E^{-1})$ | $8.05E^{-3}$                                                 | $8.58E^{-3}$ | $(8.44E^{-3}, 8.72E^{-3})$ |
| $\sigma_y$ |                    |              |                            |                                                              |              |                            |
| Cluster 1  | $1.00E^0$          | $9.50E^{-1}$ | $(9.05E^{-1}, 9.95E^{-1})$ | $1.61E^{-2}$                                                 | $1.37E^{-2}$ | $(1.35E^{-2}, 1.39E^{-2})$ |
| Cluster 2  | $1.00E^0$          | $9.46E^{-1}$ | $(9.04E^{-1}, 9.87E^{-1})$ | $8.05E^{-3}$                                                 | $8.71E^{-3}$ | $(8.58E^{-3}, 8.85E^{-3})$ |

### Experimental Newtonian ( $\alpha$ fixed)

Table S9: Results for experimental heterogeneous Newtonian data when fBm exponent is fixed at  $\alpha = 1$ . Superscripts same as Table S2.

|            | Diffusion Coefficient ( $\mu\text{m}^2/s$ ) |              |                            |
|------------|---------------------------------------------|--------------|----------------------------|
|            | $D_{fBm}^e$                                 | $D_{fBm}^p$  | $CI_{95}$                  |
| $\sigma_x$ |                                             |              |                            |
| Cluster 1  | $1.61E^{-2}$                                | $1.28E^{-2}$ | $(1.27E^{-2}, 1.29E^{-2})$ |
| Cluster 2  | $8.05E^{-3}$                                | $8.52E^{-3}$ | $(8.36E^{-3}, 8.68E^{-3})$ |
| $\sigma_y$ |                                             |              |                            |
| Cluster 1  | $1.61E^{-2}$                                | $1.36E^{-2}$ | $(1.33E^{-2}, 1.38E^{-2})$ |
| Cluster 2  | $8.05E^{-3}$                                | $8.65E^{-3}$ | $(8.48E^{-3}, 8.81E^{-3})$ |

### Simulated non-Newtonian

Table S10: Results for simulated heterogeneous non-Newtonian data. Superscripts same as Table S1.

|            | Power law exponent |              |                            | Fractional Diffusion Coefficient ( $\mu\text{m}^2/s\alpha$ ) |              |                            |
|------------|--------------------|--------------|----------------------------|--------------------------------------------------------------|--------------|----------------------------|
|            | $\alpha^s$         | $\alpha^p$   | $CI_{95}$                  | $D_{fBm}^s$                                                  | $D_{fBm}^p$  | $CI_{95}$                  |
| $\sigma_x$ |                    |              |                            |                                                              |              |                            |
| Cluster 1  | $6.40E^{-1}$       | $6.55E^{-1}$ | $(6.29E^{-1}, 6.80E^{-1})$ | $1.00E^{-4}$                                                 | $1.02E^{-4}$ | $(1.01E^{-4}, 1.04E^{-4})$ |
| Cluster 2  | $7.20E^{-1}$       | $6.61E^{-1}$ | $(6.16E^{-1}, 7.06E^{-1})$ | $4.20E^{-4}$                                                 | $4.13E^{-4}$ | $(4.05E^{-4}, 4.21E^{-4})$ |
| $\sigma_y$ |                    |              |                            |                                                              |              |                            |
| Cluster 1  | $6.40E^{-1}$       | $6.18E^{-1}$ | $(5.83E^{-1}, 6.53E^{-1})$ | $1.00E^{-4}$                                                 | $1.04E^{-4}$ | $(1.02E^{-4}, 1.06E^{-4})$ |
| Cluster 2  | $7.20E^{-1}$       | $7.00E^{-1}$ | $(6.83E^{-1}, 7.18E^{-1})$ | $4.20E^{-4}$                                                 | $4.09E^{-4}$ | $(4.06E^{-4}, 4.12E^{-4})$ |

### Experimental Non-Newtonian

Table S11: Results for experimental heterogeneous non-Newtonian data. Superscripts same as Table S2.

|            | Power law exponent |              |                            | Fractional Diffusion Coefficient ( $\mu\text{m}^2/s\alpha$ ) |              |                            |
|------------|--------------------|--------------|----------------------------|--------------------------------------------------------------|--------------|----------------------------|
|            | $\alpha^e$         | $\alpha^p$   | $CI_{95}$                  | $D_{fBm}^e$                                                  | $D_{fBm}^p$  | $CI_{95}$                  |
| $\sigma_x$ |                    |              |                            |                                                              |              |                            |
| Cluster 1  | N/A                | $6.41E^{-1}$ | $(5.91E^{-1}, 6.91E^{-1})$ | N/A                                                          | $1.03E^{-4}$ | $(1.01E^{-4}, 1.05E^{-4})$ |
| Cluster 2  | N/A                | $6.98E^{-1}$ | $(6.20E^{-1}, 7.77E^{-1})$ | N/A                                                          | $4.40E^{-4}$ | $(4.25E^{-4}, 4.55E^{-4})$ |
| $\sigma_y$ |                    |              |                            |                                                              |              |                            |
| Cluster 1  | N/A                | $6.44E^{-1}$ | $(6.08E^{-1}, 6.80E^{-1})$ | N/A                                                          | $9.88E^{-5}$ | $(9.72E^{-5}, 1.00E^{-4})$ |
| Cluster 2  | N/A                | $7.97E^{-1}$ | $(7.75E^{-1}, 8.20E^{-1})$ | N/A                                                          | $4.18E^{-4}$ | $(4.14E^{-4}, 4.22E^{-4})$ |

## Experimental Agarose

Table S122: Results for experimental agarose data. Superscripts same as Table S2.

|            | Power law exponent |              |                            | Fractional Diffusion Coefficient ( $\mu\text{m}^2/s\alpha$ ) |              |                            |
|------------|--------------------|--------------|----------------------------|--------------------------------------------------------------|--------------|----------------------------|
|            | $\alpha^e$         | $\alpha^p$   | $CI_{95}$                  | $D_{fBm}^e$                                                  | $D_{fBm}^p$  | $CI_{95}$                  |
| $\sigma_x$ |                    |              |                            |                                                              |              |                            |
| Cluster 1  | N/A                | $1.10E^{-1}$ | $(6.38E^{-2}, 1.57E^{-1})$ | N/A                                                          | $1.05E^{-4}$ | $(1.00E^{-4}, 1.10E^{-4})$ |
| Cluster 2  | N/A                | $9.36E^{-1}$ | $(8.40E^{-1}, 1.03E^0)$    | N/A                                                          | $2.61E^{-1}$ | $(2.51E^{-1}, 2.71E^{-1})$ |
| Cluster 3  | N/A                | $2.72E^{-1}$ | $(1.36E^{-1}, 4.08E^{-1})$ | N/A                                                          | $3.22E^{-3}$ | $(2.91E^{-3}, 3.53E^{-3})$ |
| Cluster 4  | N/A                | $1.08E^0$    | $(8.24E^{-1}, 1.33E^0)$    | N/A                                                          | $1.03E^{-1}$ | $(9.32E^{-2}, 1.14E^{-1})$ |
| $\sigma_y$ |                    |              |                            |                                                              |              |                            |
| Cluster 1  | N/A                | $1.28E^{-1}$ | $(4.29E^{-2}, 2.12E^{-1})$ | N/A                                                          | $1.09E^{-4}$ | $(1.00E^{-4}, 1.18E^{-4})$ |
| Cluster 2  | N/A                | $9.27E^{-1}$ | $(8.53E^{-1}, 1.00E^0)$    | N/A                                                          | $2.68E^{-1}$ | $(2.60E^{-1}, 2.76E^{-1})$ |
| Cluster 3  | N/A                | $2.07E^{-1}$ | $(7.27E^{-3}, 4.07E^{-1})$ | N/A                                                          | $2.41E^{-3}$ | $(2.02E^{-3}, 2.81E^{-3})$ |
| Cluster 4  | N/A                | $9.11E^{-1}$ | $(7.60E^{-1}, 1.06E^0)$    | N/A                                                          | $9.97E^{-2}$ | $(9.37E^{-2}, 1.06E^{-1})$ |

## Experimental HBE Mucus

Table S133: Results for experimental HBE mucus. Superscripts same as Table S2.

|            | Power law exponent |              |                            | Fractional Diffusion Coefficient ( $\mu\text{m}^2/s\alpha$ ) |              |                            |
|------------|--------------------|--------------|----------------------------|--------------------------------------------------------------|--------------|----------------------------|
|            | $\alpha^e$         | $\alpha^p$   | $CI_{95}$                  | $D_{fBm}^e$                                                  | $D_{fBm}^p$  | $CI_{95}$                  |
| $\sigma_x$ |                    |              |                            |                                                              |              |                            |
| Cluster 1  | N/A                | $8.83E^{-1}$ | $(8.73E^{-1}, 8.94E^{-1})$ | N/A                                                          | $6.61E^{-2}$ | $(6.59E^{-2}, 6.64E^{-2})$ |
| Cluster 2  | N/A                | $3.69E^{-1}$ | $(2.68E^{-1}, 4.69E^{-1})$ | N/A                                                          | $6.14E^{-3}$ | $(5.77E^{-3}, 6.52E^{-3})$ |
| Cluster 3  | N/A                | $5.87E^{-1}$ | $(5.27E^{-1}, 6.46E^{-1})$ | N/A                                                          | $2.34E^{-2}$ | $(2.28E^{-2}, 2.41E^{-2})$ |
| $\sigma_y$ |                    |              |                            |                                                              |              |                            |
| Cluster 1  | N/A                | $8.71E^{-1}$ | $(8.35E^{-1}, 9.06E^{-1})$ | N/A                                                          | $6.53E^{-2}$ | $(6.44E^{-2}, 6.62E^{-2})$ |
| Cluster 2  | N/A                | $3.65E^{-1}$ | $(2.43E^{-1}, 4.87E^{-1})$ | N/A                                                          | $6.27E^{-3}$ | $(5.81E^{-3}, 6.74E^{-3})$ |
| Cluster 3  | N/A                | $6.10E^{-1}$ | $(5.81E^{-1}, 6.38E^{-1})$ | N/A                                                          | $2.49E^{-2}$ | $(2.45E^{-2}, 2.52E^{-2})$ |

## References

1. M. T. Valentine, P. D. Kaplan, D. Thota, J. C. Crocker, T. Gisler, R. K. Prud'homme, M. Beck and D. A. Weitz, *Physical Review E Stat Nonlin Soft Matter Phys*, 2001, 64, 061506.
2. W. K. Kegel and A. van Blaaderen, *Science*, 2000, 287, 290–293.
3. H. A. Houghton, I. A. Hasnain and A. M. Donald, *European Physical Journal E*, 2008, 25, 119–127.
4. T. Savin and P. S. Doyle, *Physical Review E*, 2007, 76, 021501.
5. Y. Tseng, T. Kole and D. Wirtz, *Biophys J*, 2002, 83, 3162–3176.
